# Supplementary material for: Investigation of Cas9 antibodies in the human eye
Source: PubMed Central journal article supplement (PMC8881612; doi:10.1038/s41467-022-28674-1), 2022-02-25
Supplement: 41467_2022_28674_MOESM1_ESM.pdf [file 41467_2022_28674_MOESM1_ESM.pdf]

## **Supplemental Information**

### **Investigation of Cas9 Antibodies in the Human Eye**

Toral *et al.*

This document contains:

1. Supplemental Table 1: Human subject cohort information
2. Supplemental Table 2: Antibody information

**Supplementary Table 1. Human subject cohort information.**

| <b>Cohort 1 (n = 13) Summary Details</b> |                                              |                                                                                            |                                    |
|------------------------------------------|----------------------------------------------|--------------------------------------------------------------------------------------------|------------------------------------|
| Sex Ratio (M:F)                          | 10:3                                         |                                                                                            |                                    |
| Mean Age (s.d.)                          | M: 64.7 years (14.4)<br>F: 68.7 years (14.4) |                                                                                            |                                    |
| Median Age                               | M: 70 years<br>F: 77 years                   |                                                                                            |                                    |
| <b>Case</b>                              | <b>Age (years)</b>                           | <b>Ocular Diagnosis</b>                                                                    | <b>Cohort</b>                      |
| #1                                       | 74                                           | Macular hole, posterior intraocular lens                                                   | Paired Vitreous & Serum (cohort 1) |
| #2                                       | 77                                           | Vitreous floater                                                                           | Paired Vitreous & Serum (cohort 1) |
| #3                                       | 26                                           | Congenital cataracts, posterior intraocular lens                                           | Paired Vitreous & Serum (cohort 1) |
| #4                                       | 77                                           | Intraretinal hemorrhage, epiretinal membrane                                               | Paired Vitreous & Serum (cohort 1) |
| #5                                       | 71                                           | Epiretinal membrane, posterior vitreous detachment, retinal edema                          | Paired Vitreous & Serum (cohort 1) |
| #6                                       | 73                                           | Epiretinal membrane, posterior vitreous detachment                                         | Paired Vitreous & Serum (cohort 1) |
| #7                                       | 69                                           | Epiretinal membrane, anterior hyalosis                                                     | Paired Vitreous & Serum (cohort 1) |
| #8                                       | 66                                           | Choroidal melanoma, retinal detachment, posterior vitreous detachment, vitreous hemorrhage | Paired Vitreous & Serum (cohort 1) |
| #9                                       | 62                                           | Proliferative diabetic retinopathy, vitreous hemorrhage                                    | Paired Vitreous & Serum (cohort 1) |
| #10                                      | 52                                           | Retinal detachment, vitreous hemorrhage                                                    | Paired Vitreous & Serum (cohort 1) |
| #11                                      | 61                                           | Cone-rod dystrophy, epiretinal membrane                                                    | Paired Vitreous & Serum (cohort 1) |
| #12                                      | 74                                           | Retinitis pigmentosa, epiretinal membrane                                                  | Paired Vitreous & Serum (cohort 1) |
| #13                                      | 71                                           | Posterior vitreous detachment, vitreous hemorrhage                                         | Paired Vitreous & Serum (cohort 1) |
| <b>Cohort 2 (n = 36) Summary Details</b> |                                              |                                                                                            |                                    |
| Sex Ratio (M:F)                          | 5:4<br>(total: 25 male, 16 female)           |                                                                                            |                                    |
| Mean Age (s.d.)                          | M: 63.4 years (13.3)<br>F: 64.0 years (12.2) |                                                                                            |                                    |
| Median Age                               | M: 62.5 years<br>F: 66 years                 |                                                                                            |                                    |
| <b>Case</b>                              | <b>Age (years)</b>                           | <b>Ocular Diagnosis</b>                                                                    | <b>Cohort</b>                      |

|     |    |                                                                             |                              |
|-----|----|-----------------------------------------------------------------------------|------------------------------|
| #14 | 70 | Epiretinal membrane                                                         | Unpaired Vitreous (cohort 2) |
| #15 | 34 | Proliferative diabetic retinopathy, vitreous hemorrhage, retinal detachment | Unpaired Vitreous (cohort 2) |
| #16 | 62 | Vitreous floater                                                            | Unpaired Vitreous (cohort 2) |
| #17 | 67 | Macular hole                                                                | Unpaired Vitreous (cohort 2) |
| #18 | 81 | Epiretinal membrane, macular hole                                           | Unpaired Vitreous (cohort 2) |
| #19 | 52 | Vitreous hemorrhage, epiretinal membrane, cystoid macular edema             | Unpaired Vitreous (cohort 2) |
| #20 | 70 | Posterior vitreous detachment                                               | Unpaired Vitreous (cohort 2) |
| #21 | 61 | Macular hole                                                                | Unpaired Vitreous (cohort 2) |
| #22 | 86 | Retinal detachment                                                          | Unpaired Vitreous (cohort 2) |
| #23 | 48 | Proliferative diabetic retinopathy                                          | Unpaired Vitreous (cohort 2) |
| #24 | 67 | Macular hole, retinal detachment                                            | Unpaired Vitreous (cohort 2) |
| #25 | 48 | Proliferative diabetic retinopathy                                          | Unpaired Vitreous (cohort 2) |
| #26 | 63 | Epiretinal membrane, posterior vitreous detachment                          | Unpaired Vitreous (cohort 2) |
| #27 | 68 | Retinal detachment                                                          | Unpaired Vitreous (cohort 2) |
| #28 | 57 | Posterior vitreous detachment, cystoid macular edema                        | Unpaired Vitreous (cohort 2) |
| #29 | 66 | Epiretinal membrane                                                         | Unpaired Vitreous (cohort 2) |
| #30 | 75 | Epiretinal membrane, cystoid macular edema                                  | Unpaired Vitreous (cohort 2) |
| #31 | 72 | Recurrent macular hole, epiretinal membrane                                 | Unpaired Vitreous (cohort 2) |
| #32 | 58 | Epiretinal membrane                                                         | Unpaired Vitreous (cohort 2) |
| #33 | 56 | Epiretinal membrane, macular hole                                           | Unpaired Vitreous (cohort 2) |
| #34 | 66 | Epiretinal membrane, macular hole, posterior vitreous detachment            | Unpaired Vitreous (cohort 2) |
| #35 | 58 | Proliferative diabetic retinopathy, retinal edema                           | Unpaired Vitreous (cohort 2) |
| #36 | 84 | Retinal detachment                                                          | Unpaired Vitreous (cohort 2) |
| #37 | 58 | Epiretinal membrane, posterior vitreous detachment                          | Unpaired Vitreous (cohort 2) |
| #38 | 72 | Macular hole                                                                | Unpaired Vitreous (cohort 2) |

|     |      |                                                                        |                              |
|-----|------|------------------------------------------------------------------------|------------------------------|
| #39 | 85/F | Macular hole, posterior vitreous detachment                            | Unpaired Vitreous (cohort 2) |
| #40 | 32/M | Proliferative diabetic retinopathy, vitreous hemorrhage                | Unpaired Vitreous (cohort 2) |
| #41 | 62/M | Proliferative diabetic retinopathy, vitreous hemorrhage                | Unpaired Vitreous (cohort 2) |
| #42 | 65/F | Vitreous hemorrhage, retinal tear                                      | Unpaired Vitreous (cohort 2) |
| #43 | 56/F | Retinal detachment, epiretinal membrane                                | Unpaired Vitreous (cohort 2) |
| #44 | 69/M | Retinal detachment                                                     | Unpaired Vitreous (cohort 2) |
| #45 | 84/M | Endophthalmitis, epiretinal membrane, age-related macular degeneration | Unpaired Vitreous (cohort 2) |
| #46 | 48/F | Proliferative diabetic retinopathy, vitreous hemorrhage                | Unpaired Vitreous (cohort 2) |
| #47 | 59/M | Retinal detachment                                                     | Unpaired Vitreous (cohort 2) |
| #48 | 70/F | Epiretinal membrane, retinal edema                                     | Unpaired Vitreous (cohort 2) |
| #49 | 62/F | Retinal detachment, cataract                                           | Unpaired Vitreous (cohort 2) |

**Supplemental Table 2. Antibody information.**

| <b>Antibody</b>                            | <b>Manufacturer</b> | <b>Product number</b> | <b>Dilution Used</b> |
|--------------------------------------------|---------------------|-----------------------|----------------------|
| Goat anti-Human IgG Fc Secondary Antibody  | Bethyl Laboratories | A80-104               | 1:100,000            |
| Sheep anti-Mouse IgG Fc Secondary Antibody | GE Healthcare       | NA931V                | 1:10,000             |
